# Supplementary material for: Staphylococcal saoABC Operon Codes for a DNA-Binding Protein SaoC Implicated in the Response to Nutrient Deficit
Source: MDPI journal article supplement (doi:10.3390/ijms23126443), 2022-06-09
Supplement: s1 [file s1]

# Staphylococcal *saoABC* operon codes for a DNA-binding protein SaoC implicated in the response to nutrient deficit

Michał Bukowski<sup>1,\*</sup>, Maja Kosecka-Strojek<sup>2</sup>, Anna Madry<sup>1</sup>, Rafał Zagorski-Przybyło<sup>1</sup>, Tomasz Zadło<sup>1</sup>, Katarzyna Gawron<sup>3</sup>, Benedykt Władyka<sup>1</sup>

<sup>1</sup> Department of Analytical Biochemistry, Faculty of Biochemistry, Biophysics and Biotechnology, Jagiellonian University in Krakow, Krakow, Poland

<sup>2</sup> Department of Microbiology, Faculty of Biochemistry, Biophysics and Biotechnology, Jagiellonian University in Krakow, Krakow, Poland

<sup>3</sup> Department of Molecular Biology and Genetics, Faculty of Medical Sciences in Katowice, Medical University of Silesia, Katowice, Poland

\* Correspondence: m.bukowski@uj.edu.pl

**List S1.** Occurrence of *saoABC* operon among staphylococcal species. The *saoABC* operon has been found in 47 out of 51 staphylococcal species. Negative species are underlined. It should be noted that in case of 4 species, in genomes of which we were unable to find the operon, the number of available genomic sequences was low (<10). Results for these species might be thus unreliable and in the future *saoABC* operon will likely be found in those species as well.

|                            |                            |                                |                               |
|----------------------------|----------------------------|--------------------------------|-------------------------------|
| 1. <i>S. agnetis</i>       | 14. <i>S. delphini</i>     | 27. <i>S. lentus</i>           | 40. <i>S. saccharolyticus</i> |
| 2. <i>S. argensis</i>      | 15. <i>S. devriesei</i>    | 28. <i>S. lugdunensis</i>      | 41. <i>S. saprophyticus</i>   |
| 3. <i>S. argenteus</i>     | 16. <i>S. edaphicus</i>    | 29. <i>S. lutrae</i>           | 42. <i>S. schleiferi</i>      |
| 4. <i>S. arlettae</i>      | 17. <i>S. epidermidis</i>  | 30. <i>S. massiliensis</i>     | 43. <i>S. schweitzeri</i>     |
| 5. <i>S. aureus</i>        | 18. <i>S. equorum</i>      | 31. <i>S. microti</i>          | 44. <i>S. sciuri</i>          |
| 6. <i>S. auricularis</i>   | 19. <i>S. felis</i>        | 32. <i>S. muscae</i>           | 45. <i>S. simiae</i>          |
| 7. <i>S. capitis</i>       | 20. <i>S. fleurettii</i>   | 33. <i>S. nepalensis</i>       | 46. <i>S. simulans</i>        |
| 8. <i>S. caprae</i>        | 21. <i>S. gallinarum</i>   | 34. <i>S. pasteurii</i>        | 47. <i>S. stepanovicii</i>    |
| 9. <i>S. carnosus</i>      | 22. <i>S. haemolyticus</i> | 35. <i>S. petrasii</i>         | 48. <i>S. succinus</i>        |
| 10. <i>S. chromogenes</i>  | 23. <i>S. hominis</i>      | 36. <i>S. pettenkoferi</i>     | 49. <i>S. vitulinus</i>       |
| 11. <i>S. cohnii</i>       | 24. <i>S. hyicus</i>       | 37. <i>S. piscifermentans</i>  | 50. <i>S. warneri</i>         |
| 12. <i>S. condimentii</i>  | 25. <i>S. intermedius</i>  | 38. <i>S. pseudintermedius</i> | 51. <i>S. xylosus</i>         |
| 13. <i>S. cornubiensis</i> | 26. <i>S. kloosii</i>      | 39. <i>S. rostri</i>           |                               |

**Table S1.** Primers used in the study. Restriction sites are double-underlined, start and stop codons as well as recombinase attachment sites (*attB1/attB2*) are in bold, ribosome-binding sites (RBSs) are underlined, group II L1.LtrB-ΔORF intron target sequences are in bold and underlined.

| Name             | Sequence                                                         | Use                                           |
|------------------|------------------------------------------------------------------|-----------------------------------------------|
| pD-saoC-F        | ATACATATGTTAACTAAAGAATTTGCACAAC<br>G                             | pETDuet-saoC (NdeI/XhoI)                      |
| pD-saoC-R        | AGACTCGAGTTACAGGTTGAATAAACG                                      |                                               |
| pC-saoB-F        | CCGGTCGACTAACTAACTAATGGGGAGGTGT<br>TCTTATGG                      | pCN51-saoB (Sall/BamHI)                       |
| pC-saoB-R        | CGCGGATCCCTTAAAATGGTTTACGTAAATCC<br>ATTTC                        |                                               |
| pC-saoC-F        | CCGGTCGACTAACTAACTAATGCAGAAAGG<br>ACTTTAAAGTATG                  | pCN51-saoC (Sall/BamHI)                       |
| pC-saoC-F        | CGCGGATCCCTTACAGGTTGAATAAACGTGCG                                 |                                               |
| pK-saoA-attB1-UF | GGGGACAAGTTTGTACAAAAAAGCAGGCT<br>TGATGCCCATTTTGGAACTCTTTTC       | pKOR-del-saoA<br>( <i>attB1/SacII/attB2</i> ) |
| pK-saoA-UR       | AGGTCCCCGCGGAGTTGTGCCCCCTTTAAAA<br>ATTG                          |                                               |
| pK-saoA-DF       | AGGTCCCCGCGGTTATCACACTGAATTCAAA<br>ATGAGATTAC                    |                                               |
| pK-saoA-attB2-DR | GGGGACCACTTTGTACAAGAAAGCTGGGT<br>TTCTTCTAAATGTTGAACAATTTTACGGAC  |                                               |
| pK-saoC-attB1-F  | GGGGACAAGTTTGTACAAAAAAGCAGGCT<br>GTTCAAGAACATAACTCAGCATATG       | pKOR-del-saoC<br>( <i>attB1/SacII/attB2</i> ) |
| pK-saoC-UR       | AGGTCCCCGCGGACTTTAAAGTCCTTTCTGCA<br>TATAC                        |                                               |
| pK-saoC-DF       | AGGTCCCCGCGGACTTGTGATTTGAACACAA<br>ATTAAATAC                     |                                               |
| pK-saoC-attB2-R  | GGGGACCACTTTGTACAAGAAAGCTGGGT<br>ATCAGTGTAAGAAAAGCATTATGAAC      |                                               |
| pN-IBS1-saoB     | AAAAAAGCTTATAATTATCCTTATATTACCAA<br>ACCGTGCGCCCAGATAGGGTG        | pNL9164-saoB                                  |
| pN-EBS1-saoB     | CAGATTGTACAAATGTGGTGATAACAGATAAG<br>TCCAAACCTTTAACTTACCTTTCTTTGT |                                               |
| pN-EBS2-saoB     | TGAACGCAAGTTTCTAATTTTCGGTTAATAATC<br>GATAGAGGAAAGTGCT            |                                               |
| pN-IBS1-saoC     | AAAAAAGCTTATAATTATCCTTAGTAGACGA<br>TTTAGTGCGCCCAGATAGGGTG        | pNL9164-saoC                                  |
| pN-EBS1-saoC     | CAGATTGTACAAATGTGGTGATAACAGATAAG<br>TCGATTACGTAACCTTACCTTTCTTTGT |                                               |
| pN-EBS2-saoC     | TGAACGCAAGTTTCTAATTTTCGATTCTACTC<br>GATAGAGGAAAGTGCT             |                                               |

|                   |                                  |                             |
|-------------------|----------------------------------|-----------------------------|
| pC-P-saoABC-F     | GCTGCATGCATAACTGCTTAGGTAATCTT    | pCN35-P-saoABC-gfpmut2-term |
| pC-P-saoABC-R     | AGAGTCGACCAGGTTGAATAAACGTG       | (PaeI/SalI/BamHI/EcoRI)     |
| pC-gfpmut2-F      | CAGGTCGACAGTAAAGGAGAAGAACTTTTC   |                             |
| pC-gfpmut2-R      | CGGGGATCCCTTATTTGTATAGTTCATCCATG |                             |
| pC-term-F         | AGAGGATCCACTTGTGATTTGAACACAAATTT |                             |
| pC-term-R         | CCTGAATTCAGGAATACACAGGAGCCA      |                             |
| RT-saoA-F         | TGTTAGTTGTAGCGGTTTCGTG           | RT-qPCR                     |
| RT-saoA-R         | GCTTTGGGACCTTTAGATGCT            |                             |
| RT-saoB-F         | AGATTTAACACAAGATAACGGCCTC        |                             |
| RT-saoB-R         | GTGTGACCATCATTAGTTGGATGAA        |                             |
| RT-saoC-F         | ATCAACAGACGCTAAGACGGA            |                             |
| RT-saoC-R         | GCTCAACGCTGGCTTTTTC              |                             |
| RT-gyrB-F         | CAACAATGAACCCTGAGCACC            |                             |
| RT-gyrB-R         | CGGTTTTCTACAACGTCACCC            |                             |
| RT-23SRNA-F       | CCGAAGCTGTGGATTGTCCT             |                             |
| RT-23SRNA-R       | GCTACTCACACCGGCATTCT             |                             |
| saoA-prom-F       | AAGTTTCATCAAATAAACTGTGACCATC     | DNA pull-down               |
| saoA-prom-R       | TGTTCAACCATCTTCTCCTGTTAAC        |                             |
| saoC-prom-F       | TTCATCCAATAATGATGGTCACAC         |                             |
| saoC-prom-R       | TCTAATTCATCAAACGCTAGATCATAAC     |                             |
| saoC-prom-fr1.2-F | ATTTATGCTTTATTAGAAGAAATGGATTACG  |                             |
| saoC-prom-fr1-R   | TGAAACGTCAGTCTTGCTTCATAC         |                             |
| saoC-prom-fr2-R   | TATACTGACGTTTGTCTACGGG           |                             |
| saoC-prom-fr3-F   | TTTAAACTATGTATGAAGCAAGACTGAC     |                             |
| saoC-prom-fr3-R   | CGTTGTGCAAATCTTTAGTTAACATAC      |                             |
| saoC-rand-prom-F  | CAAATAATAGGTACAAATCTAAAGACGG     | Control for DNA pull-down   |
| saoC-rand-prom-R1 | CTCTCACTATTTTTATACGCCTTTTTATG    |                             |
| saoC-rand-prom-R2 | TGACTATAAGTAGCTAAAACATAATGTATTTG |                             |

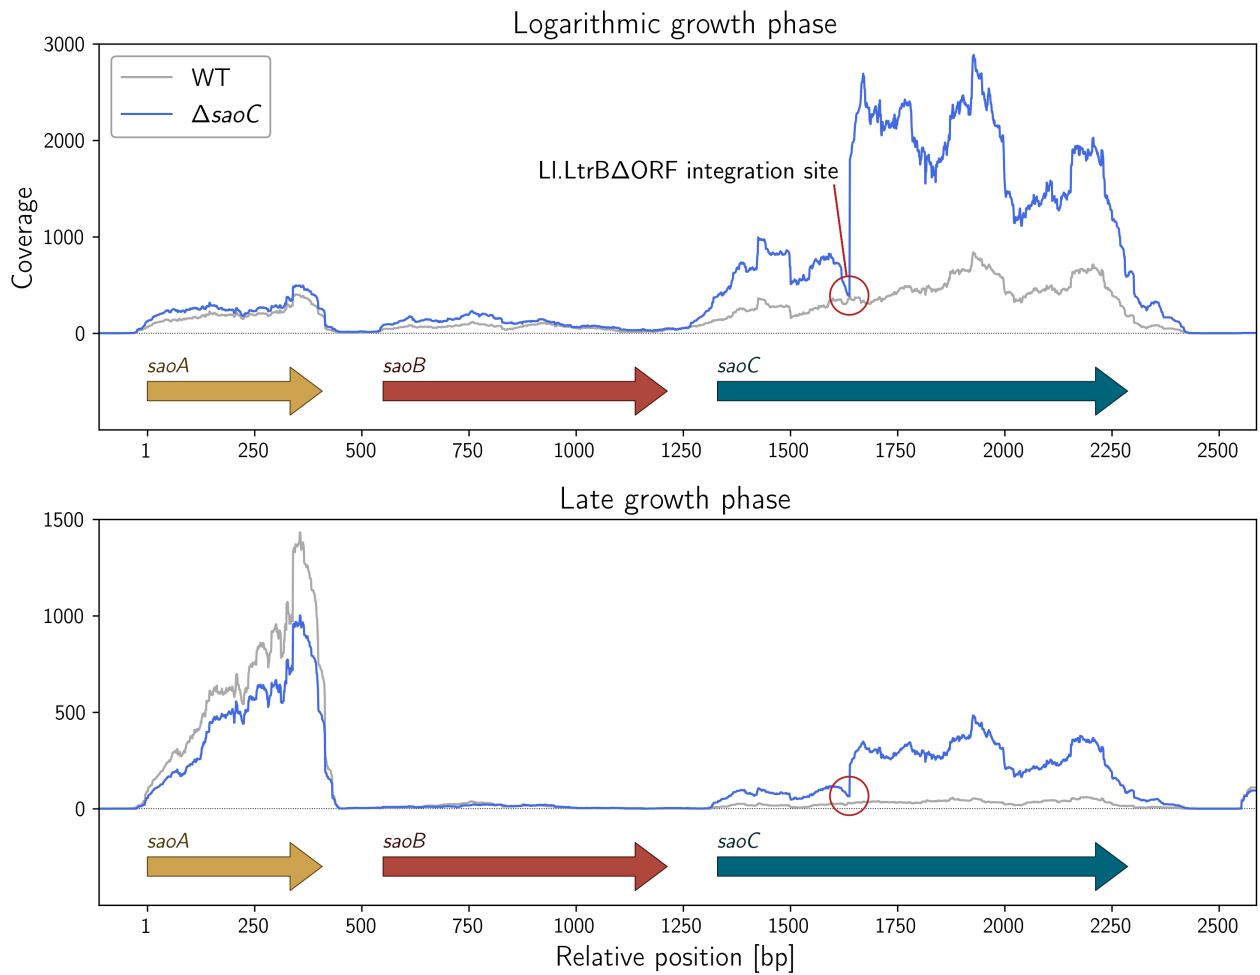

**Figure S1.** Coverage plots of reads mapped specifically to *saoABC* operon. The reads were derived from all RNA-Seq replicas either for the logarithmic (upper plot) or the late phase of growth (lower plot). In both cases clearly elevated coverage of *saoC* (disrupted by L1.LtrB $\Delta$ ORF intron) might be observed for  $\Delta$ *saoC* mutant, which corroborate the claim that functional SaoC acts as a transcriptional repressor by binding to the conserved regulatory sequence upstream its own gene.

|      |     |                                                     |     |
|------|-----|-----------------------------------------------------|-----|
| MbtS | 1   | -----MNLS-KQIKK---YRERDGYSQEYLAEKLYVSRQS-----       | 31  |
|      |     | :.      ::  :. ..  .  ::.. .. ::                    |     |
| SaoC | 1   | MLTKEFAQRVELSEKQVRKIVQHLEERGYQ---LSKTEYRGREATDFKEE  | 47  |
| MbtS | 32  | -----ISNWENDKSLPDIHN                                | 46  |
|      |     | :.  :  :   ...                                      |     |
| SaoC | 48  | DIELFKDIADKVKQTNSYDLAFDELEKEKDFLQVIVKN--DDKNLPTNQN  | 95  |
| MbtS | 47  | LLMMCelfnvtLDDLvKGTIPFVPDIKAQRSlnLwTYVmlIFMTLAAILM  | 96  |
|      |     | :...:                                               |     |
| SaoC | 96  | VAQL-----                                           | 99  |
| MbtS | 97  | GPLVVYWNWTWGVTVAILLGIGFYASMKIEDLK-----              | 129 |
|      |     | :   :                                               |     |
| SaoC | 100 | -----VEDLRLEIQKMREERHLLGQMM                         | 121 |
| MbtS | 130 | -KVH-----                                           | 132 |
|      |     | :                                                   |     |
| SaoC | 122 | NQVHQQQQELKELQNQLTSKIDSNSESLKAIQTSQEAIQEAQASQAKVLA  | 171 |
| MbtS | 133 | -----KMDNYDRIVAFMNGKDPSEVQT-----                    | 154 |
|      |     | . : . .  .: .....:..                                |     |
| SaoC | 172 | ESTNKVEKNAVTEDEKADSKDSKVAGVNTSTDAKTDTKADNAGDGTtTKVD | 221 |
| MbtS | 154 | -----                                               | 154 |
| SaoC | 222 | KEDQISATEAIEKASVEQSNGNAAETSNKEATVDAAEQHDAEQQVAEAHA  | 271 |
| MbtS | 155 | -----TKARNTMTNALSIIIS-----VIGILSLI                  | 177 |
|      |     | .   . . .:. .:.  :...:                              |     |
| SaoC | 272 | EASKQATSNDsLEAKAENDSTASQSEMSEPKPQEEKKGFFARLFNL----  | 317 |
| MbtS | 178 | IFLSVYLANkFL 189                                    |     |
| SaoC | 317 | ----- 317                                           |     |

**Figure S2.** Sequence alignment of MbtS, a transcription factor recently described for *S. aureus* [1], and SaoC. Sequence similarity between these two proteins is limited.

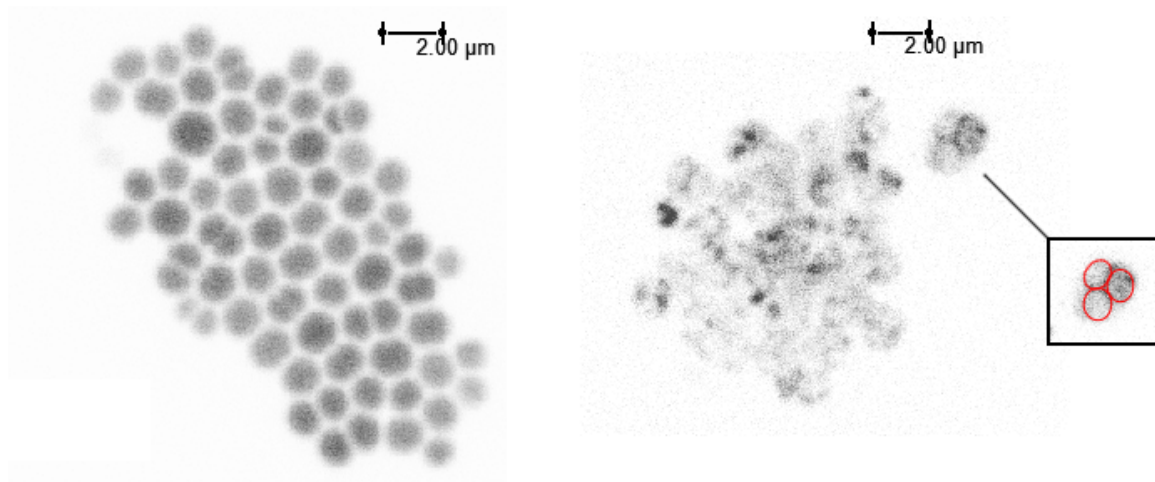

**Figure S3.** Confocal microscopy picture of *S. aureus* RN4220 transformed with pCN68 for free GFP expression (left) and pCN35-P-saoABC-gfpmut2-term carrying a copy of complete *saoABC* operon with *gfpmut-2* sequence insert for expression of SaoC-GFP fusion protein (right). In the latter case fluorescence signal forms ring-shaped halos, which indicates peripheral localisation of SaoC-GFP, likely at the inner surface of cell membrane.

CAAATAATAGGTACAAATCTAAAGACGGTAAGTGCTAGCCAACCTTGTATGATGCATTGT  
AATAACTTCGTAAATAATAATAATTAACAAATACATTATGTTTTAGCTACTTATAGTCAC  
CATAGCAAATAGTCGCTTCTAAGATAATCCACCAAATTTATTACTTATAGGTCACATTGT  
AAGCTAGTCCGAGGAGTTTAAAAAGAGTGTTGCCATGATTTAGGGATTTGTAACCAGTCA  
AAGGTCAACTTTCTTATATGGATTTGAACAAGAAATAGTGTTTTCTAGTTTTCTTCAATA  
CGTCATAGTTGATGTGCTATCTCCAATTCACAGTATCTATTTCTGAATTGGACATGGCTG  
AAGAAGGGAAAAGTTGAGGGTAGTCACAAAGTTTAAAGAATATTACATGGAATCGCCAGA  
ATGAACTAAAATCATAGGCTTCCTTATGAAGTATCCCTCAGCGAACTGTCACACGGTAAC  
TAAAGAGAAGAATGATCATAAAAAGGCGTATAAAAATAGTGAGAGT

**Sequence S1.** Shuffled *saoC* promoter sequence (saoC-rand-prom) used as a control for DNA pull-down experiments. Hybridisation sites for primers are underlined.

## References

1. Yeo, W.S.; Anokwute, C.; Marcadis, P.; Levitan, M.; Ahmed, M.; Bae, Y.; Kim, K.; Kostrominova, T.; Liu, Q.; Bae, T. A Membrane-Bound Transcription Factor Is Proteolytically Regulated by the Aaa+ Protease Ftsh in *Staphylococcus Aureus*. *J. Bacteriol.* **2020**, *202*, e00019-20. <https://doi.org/10.1128/JB.00019-20>.
